# Supplementary material for: Identification of distinct molecular subtypes of uterine carcinosarcoma
Source: PubMed Central journal article supplement (PMC5362530; doi:10.18632/oncotarget.15032), 2017-02-02
Supplement: oncotarget-08-15878-s001.pdf [file oncotarget-08-15878-s001.pdf]

# Identification of distinct molecular subtypes of uterine carcinosarcoma

## SUPPLEMENTARY FIGURES AND TABLES

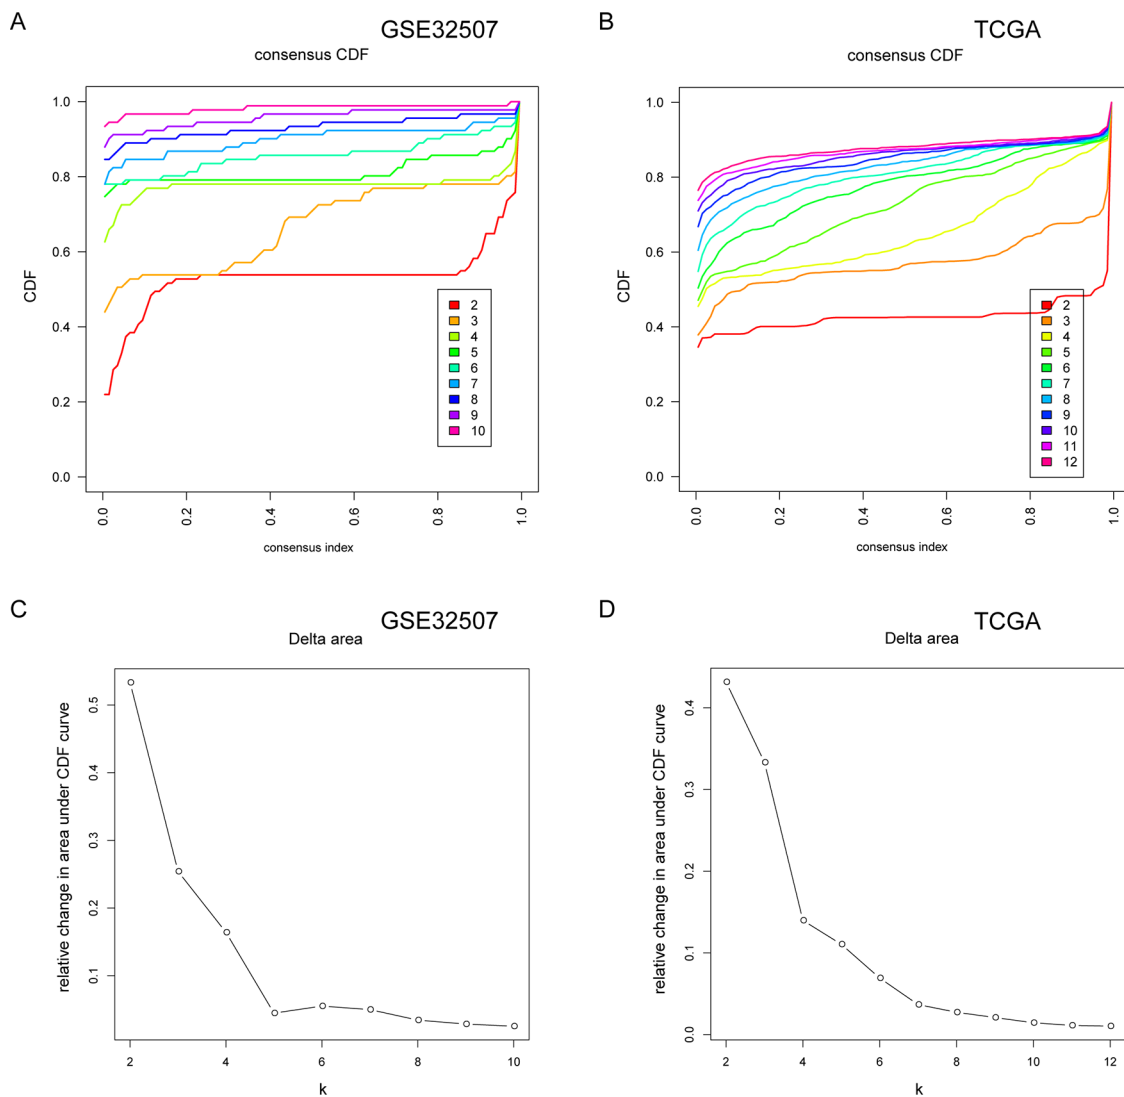

**Supplementary Figure 1: Delineation of two molecular subtypes of UCS.** A. and B. Empirical cumulative distribution plots for GSE32507 and TCGA dataset, respectively. C. and D. The increased area under the CDF curve along with increased number of molecular subtypes.

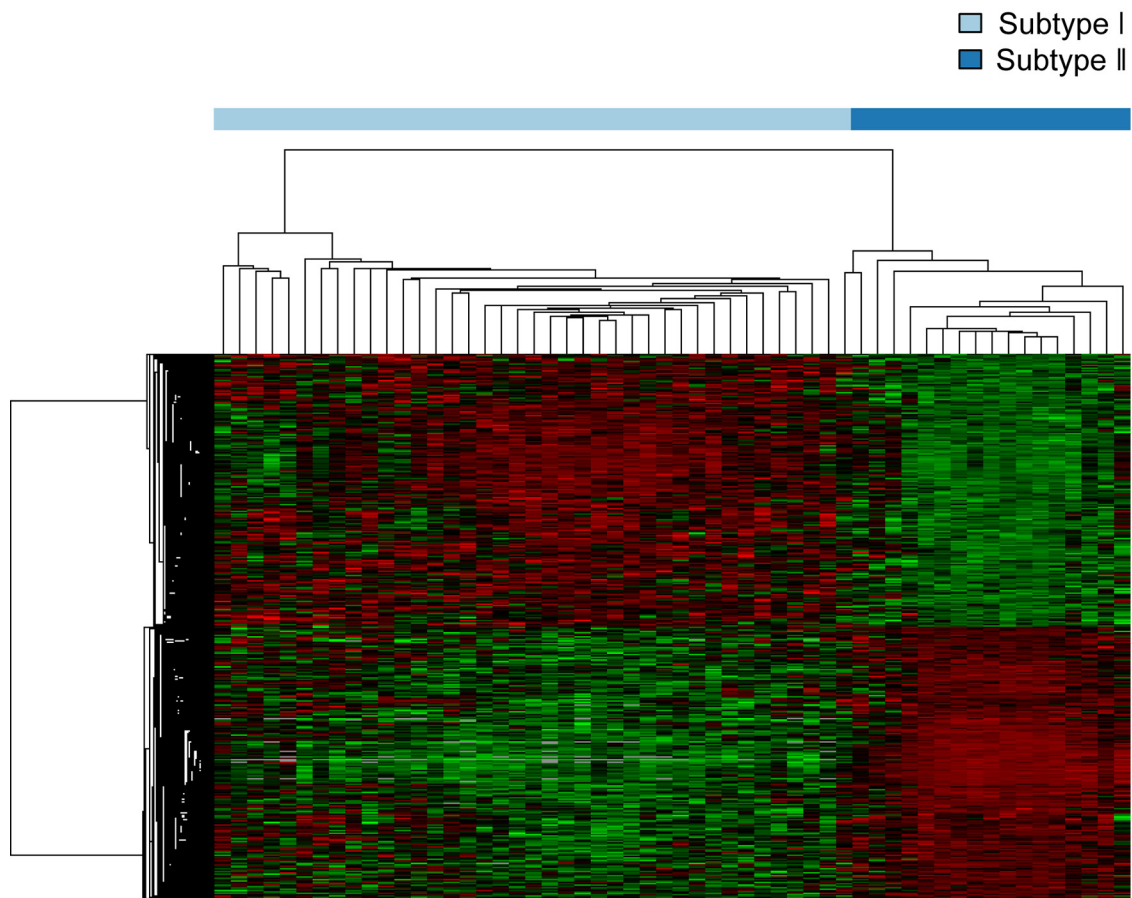

**Supplementary Figure 2: Heatmap of top 500 genes over-expressed in distinct molecular subtypes.** After SAM-seq, we picked top 500 genes over-expressed in each subtype to form TOP500. Hierarchical clustering of TOP500 was performed by Cluster 3.0 using centroid linkage method. Red, over-expressed genes; Green, down-expressed genes.

**Supplementary Table 1: Clinicopathologic Characteristics (N = 57)**

See Supplementary File 1

**Supplementary Table 2: Pathways enriched in each molecular subtype**

See Supplementary File 1
